# Supplementary material
Source: publisher figshare collection journal article supplement (https://rs.figshare.com/ndownloader/files/17842619)
Supplement: Supplementary file 1 [file 17842619]

20	0.3	0.6	1	1	0.03	0.04	0.4	0.3	10	1	115.41	0.05375
20	0.3	0.5	1	1	0.03	0.04	0.4	0.3	10	1	113.49	0.05055
20	0.3	0.4	1	1	0.03	0.04	0.4	0.3	10	1	111.75	0.04967
20	0.4	0.5	1	1	0.03	0.04	0.4	0.3	10	1	118.79	0.04969
20	0.4	0.4	1	1	0.03	0.04	0.4	0.3	10	1	115.67	0.04978
20	0.3	0.6	1	1	0.03	0.04	0.4	0.5	10	1	113.72	0.04831
20	0.3	0.5	1	1	0.03	0.04	0.4	0.2	10	1	114.49	0.05085
20	0.4	0.6	1	1	0.03	0.04	0.4	0.3	10	1	122.03	0.05315
20	0.4	0.3	1	1	0.03	0.04	0.4	0.3	10	1	113.88	0.05077
20	0.5	0.3	1	1	0.03	0.04	0.4	0.3	10	1	116.8	0.05071
20	0.3	0.4	1	1	0.03	0.04	0.4	0.5	10	1	110.53	0.04692
20	0.4	0.6	1	1	0.03	0.04	0.4	0.5	10	1	119.78	0.04977
20	0.3	0.6	1	1	0.03	0.04	0.4	0.4	10	1	113.98	0.05018
20	0.3	0.3	1	1	0.03	0.04	0.4	0.3	10	1	112.59	0.05117
20	0.4	0.5	1	1	0.03	0.04	0.4	0.5	10	1	118.18	0.04999
20	0.4	0.4	1	1	0.03	0.04	0.4	0.6	10	1	115.66	0.04954
20	0.5	0.6	1	1	0.03	0.04	0.4	0.7	10	1	128.16	0.04883
20	0.5	0.5	1	1	0.03	0.04	0.4	0.4	10	1	123.39	0.05016
20	0.5	0.3	1	1	0.03	0.04	0.4	0.2	10	1	115.25	0.04913
20	0.4	0.7	1	1	0.03	0.04	0.4	0.6	10	1	124.6	0.05082
20	0.5	0.5	1	1	0.03	0.04	0.4	0.7	10	1	122.91	0.04963
20	0.4	0.6	1	1	0.03	0.04	0.4	0.6	10	1	120.2	0.04889
20	0.5	0.6	1	1	0.03	0.04	0.4	0.4	10	1	128.77	0.05137
20	0.3	0.5	1	1	0.03	0.04	0.4	0.4	10	1	112.77	0.04814
20	0.4	0.5	1	1	0.03	0.04	0.4	0.2	10	1	119.6	0.05286
20	0.3	0.3	1	1	0.03	0.04	0.4	0.2	10	1	110.32	0.04956
20	0.4	0.4	1	1	0.03	0.04	0.4	0.5	10	1	116.75	0.0504
20	0.4	0.4	1	1	0.03	0.04	0.4	0.2	10	1	116.23	0.05063
20	0.5	0.4	1	1	0.03	0.04	0.4	0.5	10	1	121.37	0.05115
20	0.5	0.7	1	1	0.03	0.04	0.4	0.7	10	1	133.87	0.05067
20	0.4	0.3	1	1	0.03	0.04	0.4	0.5	10	1	115.38	0.05334
20	0.3	0.3	1	1	0.03	0.04	0.4	0.5	10	1	110.82	0.04966
20	0.5	0.5	1	1	0.03	0.04	0.4	0.5	10	1	124.1	0.05054
20	0.3	0.4	1	1	0.03	0.04	0.4	0.2	10	1	113.37	0.05024
20	0.6	0.5	1	1	0.03	0.04	0.4	0.5	10	1	129.89	0.04935
20	0.5	0.5	1	1	0.03	0.04	0.4	0.9	10	1	123.16	0.04967
20	0.3	0.5	1	1	0.03	0.04	0.4	0.5	10	1	111.89	0.04707
20	0.6	0.4	1	1	0.03	0.04	0.4	0.5	10	1	123.75	0.05075
20	0.5	0.5	1	1	0.03	0.04	0.4	0.8	10	1	123.93	0.04917
20	0.5	0.4	1	1	0.03	0.04	0.4	0.4	10	1	119.94	0.05116
20	0.5	0.6	1	1	0.03	0.04	0.4	0.5	10	1	128.78	0.05087
20	0.5	0.5	1	1	0.03	0.04	0.4	0.2	10	1	124.35	0.04975
20	0.5	0.2	1	1	0.03	0.04	0.4	0.2	10	1	111.85	0.04979
20	0.6	0.5	1	1	0.03	0.04	0.4	0.7	10	1	130.94	0.05047
20	0.4	0.2	1	1	0.03	0.04	0.4	0.2	10	1	112.09	0.05118
20	0.5	0.3	1	1	0.03	0.04	0.4	0.5	10	1	116.26	0.0532
20	0.5	0.6	1	1	0.03	0.04	0.4	0.8	10	1	127.75	0.04891
20	0.5	0.6	1	1	0.03	0.04	0.4	0.6	10	1	128.66	0.04994
20	0.5	0.3	1	1	0.03	0.04	0.4	0.4	10	1	117.11	0.05105
20	0.5	0.4	1	1	0.03	0.04	0.4	0.6	10	1	120.83	0.05102
20	0.4	0.3	1	1	0.03	0.04	0.4	0.2	10	1	113.6	0.04939
20	0.6	0.4	1	1	0.03	0.04	0.4	0.4	10	1	123.24	0.04915
20	0.6	0.6	1	1	0.03	0.04	0.4	0.5	10	1	136.54	0.04946
20	0.2	0.5	1	1	0.03	0.04	0.4	0.2	10	1	109.28	0.05067
20	0.5	0.8	1	1	0.03	0.04	0.4	0.7	10	1	144.7	0.05756
20	0.6	0.6	1	1	0.03	0.04	0.4	0.7	10	1	138.74	0.05083
20	0.5	0.7	1	1	0.03	0.04	0.4	0.8	10	1	134.28	0.05011
20	0.5	0.7	1	1	0.03	0.04	0.4	0.6	10	1	134.06	0.05261
20	0.3	0.2	1	1	0.03	0.04	0.4	0.2	10	1	111.33	0.05258
20	0.6	0.5	1	1	0.03	0.04	0.4	0.8	10	1	132.04	0.05239
20	0.6	0.5	1	1	0.03	0.04	0.4	0.9	10	1	131.37	0.0528
20	0.6	0.4	1	1	0.03	0.04	0.4	0.6	10	1	124.9	0.05187
20	0.6	0.5	1	1	0.03	0.04	0.4	0.4	10	1	129.49	0.04898
20	0.6	0.6	1	1	0.03	0.04	0.4	0.4	10	1	137.26	0.05034
20	0.3	0.4	1	1	0.03	0.04	0.4	0.4	10	1	112.28	0.04841
20	0.5	0.8	1	1	0.03	0.04	0.4	0.8	10	1	142.61	0.05425
20	0.6	0.5	1	1	0.03	0.04	0.4	0.6	10	1	130.56	0.05041
20	0.5	0.4	1	1	0.03	0.04	0.4	0.2	10	1	118.36	0.04903
20	0.4	0.6	1	1	0.03	0.04	0.4	0.4	10	1	121.65	0.05189
20	0.6	0.3	1	1	0.03	0.04	0.4	0.4	10	1	119.67	0.05254
20	0.6	0.6	1	1	0.03	0.04	0.4	0.6	10	1	138.24	0.04987
20	0.6	0.6	1	1	0.03	0.04	0.4	0.8	10	1	136.72	0.04987
20	0.6	0.7	1	1	0.03	0.04	0.4	0.7	10	1	145.68	0.05014
20	0.7	0.4	1	1	0.03	0.04	0.4	0.6	10	1	131.05	0.05222
20	0.6	0.6	1	1	0.03	0.04	0.4	0.9	10	1	137.76	0.05086
20	0.7	0.5	1	1	0.03	0.04	0.4	0.6	10	1	137.44	0.04937
20	0.5	0.6	1	1	0.03	0.04	0.4	0.9	10	1	126.99	0.04741
20	0.7	0.5	1	1	0.03	0.04	0.4	0.8	10	1	137.83	0.05194
20	0.4	0.5	1	1	0.03	0.04	0.4	0.6	10	1	118.69	0.0491
20	0.6	0.3	1	1	0.03	0.04	0.4	0.5	10	1	119.76	0.05401
20	0.3	0.3	1	1	0.03	0.04	0.4	0.4	10	1	111.92	0.05006
20	0.5	0.7	1	1	0.03	0.04	0.4	0.9	10	1	132.35	0.04779
20	0.7	0.5	1	1	0.03	0.04	0.4	0.9	10	1	140.15	0.05447
20	0.6	0.7	1	1	0.03	0.04	0.4	0.8	10	1	145.23	0.05107
20	0.6	0.7	1	1	0.03	0.04	0.4	0.9	10	1	147.11	0.05053
20	0.5	0.5	1	1	0.03	0.04	0.4	0.6	10	1	123.65	0.04987
20	0.5	0.8	1	1	0.03	0.04	0.4	0.9	10	1	142.25	0.05329
20	0.7	0.6	1	1	0.03	0.04	0.4	0.7	10	1	147.06	0.04831
20	0.6	0.7	1	1	0.03	0.04	0.4	0.6	10	1	146.82	0.05223
20	0.4	0.4	1	1	0.03	0.04	0.4	0.4	10	1	117.09	0.04977
20	0.7	0.6	1	1	0.03	0.04	0.4	0.6	10	1	146.7	0.0478
20	0.6	0.8	1	1	0.03	0.04	0.4	0.7	10	1	162.03	0.05833
20	0.7	0.6	1	1	0.03	0.04	0.4	0.8	10	1	148.88	0.04878
20	0.8	0.5	1	1	0.03	0.04	0.4	0.8	10	1	147.86	0.05085
20	0.6	0.8	1	1	0.03	0.04	0.4	0.9	10	1	159.8	0.05378
20	0.5	0.5	1	1	0.03	0.04	0.4	0.3	10	1	123.08	0.04893
20	0.4	0.5	1	1	0.03	0.04	0.4	0.4	10	1	118.64	0.04869
20	0.4	0.3	1	1	0.03	0.04	0.4	0.4	10	1	114.28	0.05155
20	0.8	0.5	1	1	0.03	0.04	0.4	0.7	10	1	147.2	0.04768
20	0.8	0.5	1	1	0.03	0.04	0.4	0.9	10	1	150.59	0.05417
20	0.7	0.5	1	1	0.03	0.04	0.4	0.7	10	1	138.3	0.05186
20	0.6	0.6	1	1	0.03	0.04	0.4	0.3	10	1	138.06	0.04934
20	0.6	0.8	1	1	0.03	0.04	0.4	0.8	10	1	163.13	0.0572
20	0.5	0.4	1	1	0.03	0.04	0.4	0.3	10	1	118.55	0.04852
20	0.6	0.4	1	1	0.03	0.04	0.4	0.3	10	1	122.62	0.04815
20	0.7	0.7	1	1	0.03	0.04	0.4	0.7	10	1	162.29	0.04979
20	0.8	0.6	1	1	0.03	0.04	0.4	0.7	10	1	159.71	0.04567
20	0.7	0.7	1	1	0.03	0.04	0.4	0.6	10	1	162.24	0.05072
20	0.6	0.3	1	1	0.03	0.04	0.4	0.3	10	1	116.81	0.04887
20	0.7	0.7	1	1	0.03	0.04	0.4	0.8	10	1	161.79	0.05033
20	0.8	0.6	1	1	0.03	0.04	0.4	0.9	10	1	162.37	0.04928
20	0.5	0.6	1	1	0.03	0.04	0.4	0.3	10	1	129.41	0.05309
20	0.7	0.6	1	1	0.03	0.04	0.4	0.9	10	1	149.84	0.05085
20	0.7	0.7	1	1	0.03	0.04	0.4	0.9	10	1	161.31	0.04886
20	0.6	0.5	1	1	0.03	0.04	0.4	0.3	10	1	128.31	0.04753
20	0.8	0.6	1	1	0.03	0.04	0.4	0.8	10	1	161.76	0.048
20	0.7	0.8	1	1	0.03	0.04	0.4	0.7	10	1	185.06	0.05507
20	0.7	0.8	1	1	0.03	0.04	0.4	0.8	10	1	183.9	0.05372
20	0.8	0.7	1	1	0.03	0.04	0.4	0.9	10	1	182.97	0.04801
20	0.8	0.7	1	1	0.03	0.04	0.4	0.8	10	1	183	0.04695
20	0.7	0.8	1	1	0.03	0.04	0.4	0.9	10	1	183.24	0.05314
20	0.8	0.7	1	1	0.03	0.04	0.4	0.7	10	1	180.14	0.04494
20	0.8	0.8	1	1	0.03	0.04	0.4	0.8	10	1	212.82	0.0486
20	0.8	0.8	1	1	0.03	0.04	0.4	0.9	10	1	216.12	0.05011
20	0.8	0.8	1	1	0.03	0.04	0.4	0.7	10	1	216.63	0.0506
20	0.2	0.4	1	1	0.03	0.04	0.4	0.2	10	1	109.68	0.04917
20	0.2	0.3	1	1	0.03	0.04	0.4	0.2	10	1	109.35	0.04953
20	0.4	0.4	1	1	0.03	0.04	0.4	0.1	10	1	116.22	0.05137
20	0.2	0.4	1	1	0.03	0.04	0.4	0.1	10	1	109.88	0.0517
20	0.3	0.4	1	1	0.03	0.04	0.4	0.1	10	1	112.86	0.05012
20	0.3	0.3	1	1	0.03	0.04	0.4	0.1	10	1	111.63	0.04942
20	0.1	0.4	1	1	0.03	0.04	0.4	0.1	10	1	106.29	0.0495
20	0.4	0.3	1	1	0.03	0.04	0.4	0.1	10	1	113.13	0.04938
20	0.1	0.3	1	1	0.03	0.04	0.4	0.1	10	1	106.73	0.047
20	0.2	0.3	1	1	0.03	0.04	0.4	0.1	10	1	109.73	0.04989
20	0.2	0.2	1	1	0.03	0.04	0.4	0.2	10	1	109.6	0.04968
20	0.4	0.2	1	1	0.03	0.04	0.4	0.1	10	1	111.13	0.04993
20	0.3	0.3	1	1	0.03	0.04	0.4	0	10	1	112.31	0.05108
20	0.3	0.2	1	1	0.03	0.04	0.4	0.1	10	1	110.92	0.05035
20	0.1	0.2	1	1	0.03	0.04	0.4	0.1	10	1	106.86	0.04918
20	0.1	0.3	1	1	0.03	0.04	0.4	0	10	1	107.37	0.05111
20	0.2	0.2	1	1	0.03	0.04	0.4	0.1	10	1	109.03	0.04993
20	0.4	0.1	1	1	0.03	0.04	0.4	0.1	10	1	109.69	0.05165
20	0.1	0.2	1	1	0.03	0.04	0.4	0	10	1	108.56	0.04985
20	0.01	0.3	1	1	0.03	0.04	0.4	0	10	1	103.7	0.04715
20	0.2	0.3	1	1	0.03	0.04	0.4	0	10	1	109.61	0.05084
20	0.2	0.1	1	1	0.03	0.04	0.4	0	10	1	108.96	0.05083
20	0.3	0.1	1	1	0.03	0.04	0.4	0.1	10	1	110.53	0.0528
20	0.2	0.1	1	1	0.03	0.04	0.4	0.1	10	1	109.29	0.05116
20	0.01	0.2	1	1	0.03	0.04	0.4	0	10	1	103.79	0.04549
20	0.3	0.1	1	1	0.03	0.04	0.4	0	10	1	108.21	0.04889
20	0.2	0.2	1	1	0.03	0.04	0.4	0	10	1	109.4	0.04995
20	0.3	0.2	1	1	0.03	0.04	0.4	0	10	1	109.68	0.04973
20	0.1	0.1	1	1	0.03	0.04	0.4	0.1	10	1	108.56	0.05011
20	0.01	0.1	1	1	0.03	0.04	0.4	0	10	1	105.84	0.04748
20	0.1	0.1	1	1	0.03	0.04	0.4	0	10	1	108.06	0.0503
20	0.3	0.01	1	1	0.03	0.04	0.4	0	10	1	105.26	0.05102
20	0.1	0.01	1	1	0.03	0.04	0.4	0	10	1	107.4	0.05164
20	0.2	0.01	1	1	0.03	0.04	0.4	0	10	1	106.68	0.05125
20	0.01	0.01	1	1	0.03	0.04	0.4	0	10	1	108.8	0.05217
